# Supplementary material for: Percepties van discriminatie en diversiteit op het werk binnen het Amsterdam Public Health research institute
Source: Springer Nature journal article supplement (doi:10.1007/s12508-023-00415-9), 2023-11-13
Supplement: MOESM1 [file 26300184]

**Appendix 1. Topiclijst interviews**

**Concept van diversiteit**

- Hoe zie jij jouw afdeling voor je wanneer deze divers zou zijn? En inclusief?
- Hoe dichtbij of ver daar vandaan zijn we nu?
- Hoe positioneer jij jezelf aangaande diversiteit en inclusie? Is het iets wat als dichtbij voelt, verder weg, waar je een link mee hebt?
- Hoe divers zijn de collega’s waar je nu mee werkt en de collega’s waar je goed mee omgaat of bevriend mee bent?
- Is er groepsvorming binnen jouw afdeling en zijn zij op basis van iets een groep?

**Interactie met een divers team**

Hoe is het voor jou om te werken met een divers team? Of als je het nu nog niet doet, hoe denk je dat dat voor jou zou zijn?

Hoe voel je je daarbij?

Wat is makkelijk?

Wat is moeilijk?

Heb jij nog iets nodig om dit beter te laten verlopen?

**Discriminatie of uitsluiting op werk**

- De resultaten vanuit de vragenlijst wijzen uit dat er voornamelijk discriminatie op basis van hiërarchische positie wordt ervaren en op basis van gender. Is dit iets wat jullie herkennen en kunnen jullie dat verder uitleggen?
- Zijn er nog andere vormen van discriminatie die je zelf ervaart of ziet binnen jouw afdeling?
- Hoe zouden we een meer inclusieve organisatie kunnen creëren?
  - Hoe breed zullen zulke ideeën worden gedragen?
