# Supplementary material for: Percepties van discriminatie en diversiteit op het werk binnen het Amsterdam Public Health research institute
Source: Springer Nature journal article supplement (doi:10.1007/s12508-023-00415-9), 2023-11-13
Supplement: MOESM2 [file 26300184]

**Appendix 2. Lijst van vragen gerelateerd aan elke factor binnen elk thema**

**Thema 1: Gevoel van erbij horen en geïncludeerd worden**

|  |
| --- |

- Subfactor 1: Ervaren discriminatie

"Ik word gediscrimineerd"

"Ik zie praktijken die ik uitsluitend of discriminerend vind voor mijzelf of voor anderen"

"Ik ondervind uitsluiting en discriminatie in mijn meest directe werkomgeving"

- Subfactor 2: Veiligheid en serieus genomen worden

"Mijn bijdragen tijdens vergaderingen worden serieus genomen"

“Ik voel me veilig om problemen aan te kaarten bij mijn leidinggevende(n)"

"Ik word serieus genomen door mijn leidinggevende(n)"

"Ik denk dat het zinloos is als ik kritiek uit op de gang van zaken binnen mijn afdeling, omdat er niets zal veranderen"

- Subfactor 3: Deelnemen aan bijeenkomsten binnen de afdeling

"Als er een borrel of andere sociale activiteit is, neem ik hieraan deel"

"Als er een vergadering is, neem ik hieraan deel"

**Thema 2: Houding ten opzichte van D&I**

- Subfactor 1: Positieve houding ten opzichte van diversiteit

"Diversiteit in achtergronden, culturen, levensstijlen en denkscholen verrijkt de academische omgeving"

"Ik zou het toejuichen als mijn directe werkomgeving binnen mijn afdeling meer divers wordt qua achtergronden, culturen en levensstijlen"

"Het is belangrijk dat iedereen zich bewust is van de meerwaarde van verschillen tussen mensen"

"Als ik gevraagd zou worden voor een commissie die diversiteit en discriminatie gaat onderzoeken binnen mijn afdeling, zou ik hieraan deelnemen”

"Als er een masterclass zou worden aangeboden over het omgaan met diversiteit als professional, zou ik hieraan deelnemen**"**

- Subfactor 2: Tegen het benadrukken van diversiteit omdat deze nadruk contra-effectief kan zijn

"Aandacht voor specifieke groepen is onnodig, want iedereen is gelijk"

"Aandacht voor specifieke groepen is onwenselijk, want dit doet afbreuk aan de kwaliteit van onderzoek en onderwijs"

"Aandacht voor specifieke groepen is onwenselijk, want dit versterkt hun positie als ‘anders’"

- Subfactor 3: Zich onveilig voelen in een diverse omgeving

"Ik voel me veiliger in een werkomgeving met mensen die zo zijn als ik qua achtergronden, culturen en levensstijlen"

"Ik voel me ongemakkelijk wanneer het thema diversiteit en achterstelling besproken wordt"

**Thema 3: Houding tegenover de rol van de afdeling**

- Subfactor 1: De werkplek biedt bescherming tegen uitsluiting en discriminatie

"Als ik melding zou maken van uitsluiting en/of discriminatie, zou ik serieus genomen worden"

"Als ik voorvallen van uitsluiting en/of discriminatie zou aankaarten, zou er iets aan gedaan worden"

- Subfactor 2: De werkplek moet verdere maatregelen nemen om diversiteit te bevorderen

"Als universitaire afdeling speelt mijn afdeling een belangrijke rol bij het vormen van verantwoordelijke burgers"

"Mijn afdeling moet meer doen om de diversiteit onder medewerkers te vergroten"

"Mijn afdeling moet meer doen om de instelling inclusiever te maken en uitsluiting tegen te gaan"
